# Supplementary material
Source: HighWire-hosted journal article supplement (https://jcp.bmjjournals.com/content/suppl/2007/11/07/60.11.1296)

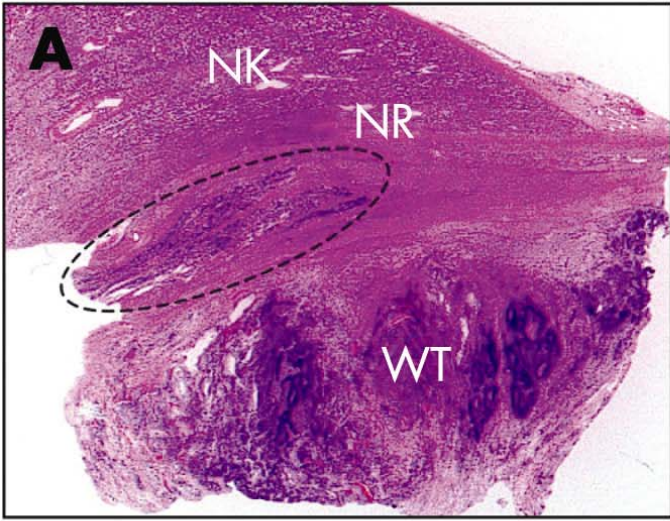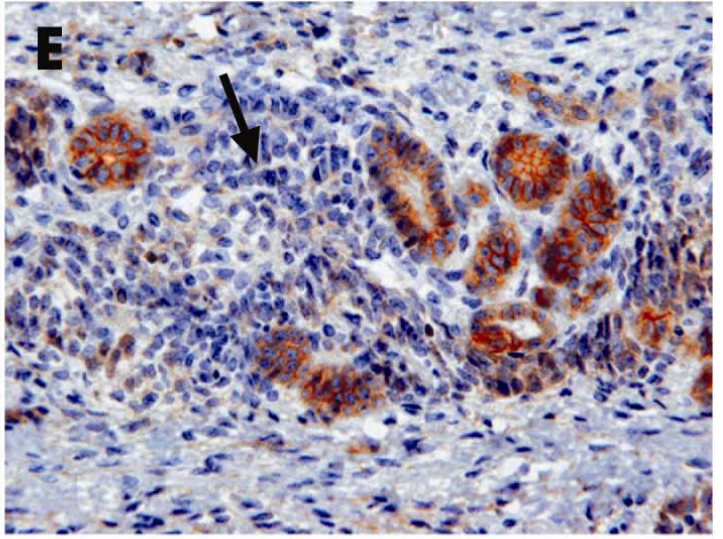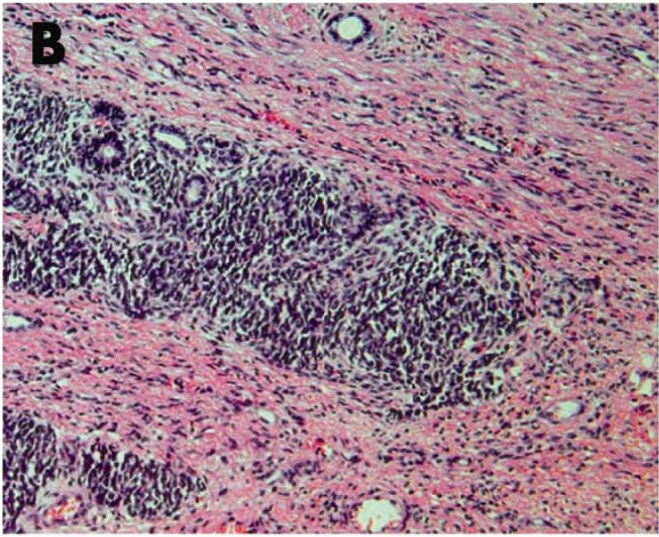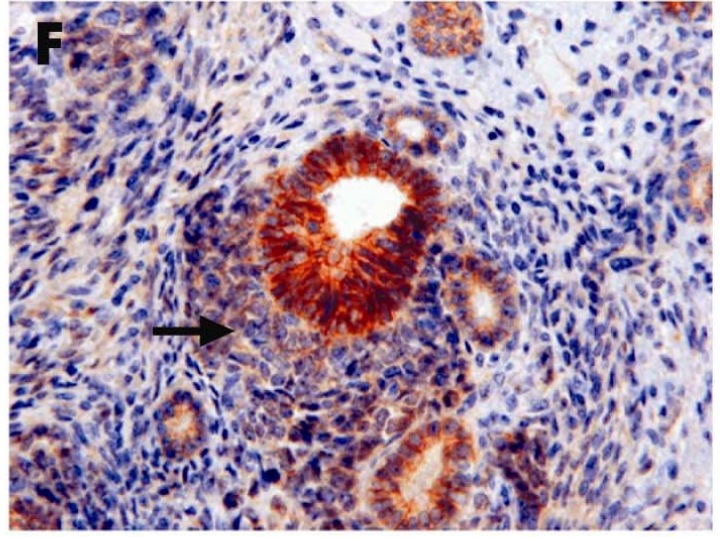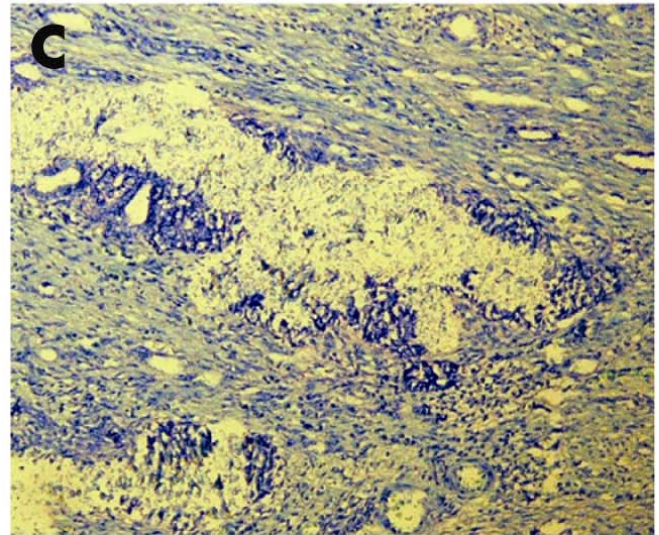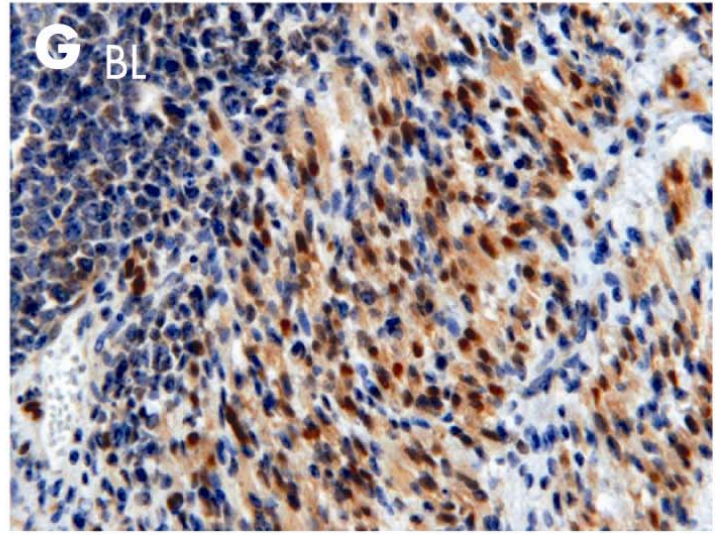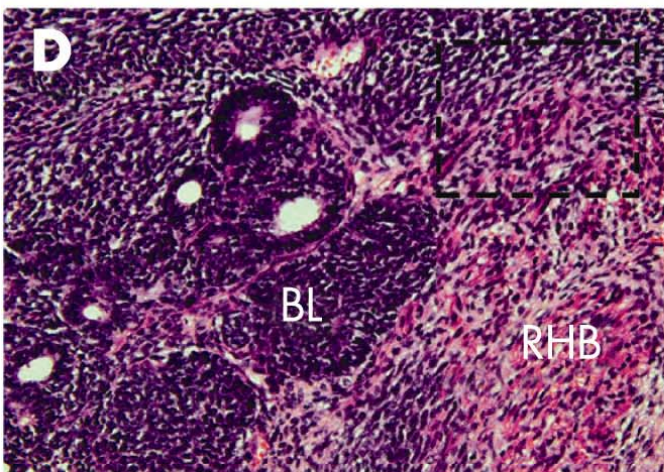

Supplement: 60111296webonlyfig.pdf [file 60111296webonlyfig.pdf]
